# Supplementary material for: Microbiome and Volatile Metabolic Profile of Acetic Acid Fermentation Using Multiple Starters for Traditional Grain Vinegar
Source: MDPI journal article supplement (doi:10.3390/fermentation9050423), 2023-04-27
Supplement: s1 [file s1]

# Microbiome and Volatile Metabolic Profile of Acetic Acid Fermentation Using Multiple Starters for Traditional Grain Vinegar

Haram Kong, Sun-Hee Kim, Woo-Soo Jeong, So-Young Kim and Soo-Hwan Yeo \*

Fermented and Processed Food Science Division, Department of Agrofood Resources,  
NIAS, RDA, Wanju 55365, Republic of Korea

\* Correspondence: yeobio@korea.kr; Tel.: +82-63-238-3609; Fax: +82-63-238-3843

## Supplementary files:

**Table 1.** Fermentation efficiency according to concentration of ethanol and initial pH

**Table 2.** Fermentation efficiency under multiple starters according to initial pH and fermentation period

**Table 3.** Volatile compounds according to fermentation period using *Acetobacter ascendens* GV-8 (A) and *A. ascendens* GV-12 (B) (Unit: Area%)

**Table 4.** The volatile compound according to fermentation period using *Acetobacter ascendens* GV-8 (A) and *Acetobacter pasteurianus* GV-22 (D) (Unit: Area%)

**Table 5.** The volatile compound according to fermentation period using *A. ascendens* GV-8 (A), *A. ascendens* GV-12 (B), *A. pasteurianus* GV-17 (C), and *A. pasteurianus* GV-22 (D) (Unit: Area%)

**Table 6.** Alpha diversity analysis under multiple starters and fermentation temperature

**Table 1.** Fermentation efficiency according to concentration of ethanol and initial pH.

| Fermented condition   | Strains | Efficiency (%) according to the fermentation period (days) |                           |                            |                           |                           |                           |
|-----------------------|---------|------------------------------------------------------------|---------------------------|----------------------------|---------------------------|---------------------------|---------------------------|
|                       |         | 3                                                          | 6                         | 9                          | 12                        | 15                        |                           |
| Concentration of EtOH | 5%      | GV-5                                                       | 14.72±2.61 <sup>1,a</sup> | 35.12±7.36 <sup>a</sup>    | 50.61±5.68 <sup>ab</sup>  | 60.12±3.99 <sup>a</sup>   | 67.02±2 <sup>ab</sup>     |
|                       |         | GV-8                                                       | 13.96±1.38 <sup>a</sup>   | 32.67±4.3 <sup>a</sup>     | 53.53±5.06 <sup>ab</sup>  | 59.66±0.31 <sup>a</sup>   | 62.12±2.15 <sup>c</sup>   |
|                       |         | GV-12                                                      | 14.42±1.54 <sup>a</sup>   | 29.45±3.53 <sup>a</sup>    | 43.4±2.61 <sup>b</sup>    | 62.58±1.84 <sup>a</sup>   | 67.79±0.15 <sup>a</sup>   |
|                       |         | GV-16                                                      | 15.95±2.45 <sup>a</sup>   | 30.21±10.59 <sup>a</sup>   | 46.78±5.98 <sup>ab</sup>  | 59.36±6.6 <sup>a</sup>    | 65.34±3.38 <sup>abc</sup> |
|                       |         | GV-17                                                      | 14.26±3.53 <sup>a</sup>   | 29.14±8.9 <sup>a</sup>     | 44.63±9.51 <sup>ab</sup>  | 54.14±8.13 <sup>a</sup>   | 66.26±2.3 <sup>ab</sup>   |
|                       |         | GV-22                                                      | 15.03±1.23 <sup>a</sup>   | 32.67±2.3 <sup>a</sup>     | 54.91±3.22 <sup>a</sup>   | 61.35±1.69 <sup>a</sup>   | 63.34±0.31 <sup>bc</sup>  |
|                       | 8%      | GV-5                                                       | 1.34±1.06 <sup>b</sup>    | 7.38±2.11 <sup>b</sup>     | 18.12±4.6 <sup>b</sup>    | 27.32±2.59 <sup>b</sup>   | 40.55±3.36 <sup>c</sup>   |
|                       |         | GV-8                                                       | 0.96±0.77 <sup>b</sup>    | 6.9±2.3 <sup>b</sup>       | 17.16±3.45 <sup>b</sup>   | 26.36±2.69 <sup>b</sup>   | 37.96±4.79 <sup>c</sup>   |
|                       |         | GV-12                                                      | 4.51±0.68 <sup>a</sup>    | 15.34±2.3 <sup>a</sup>     | 27.51±5.66 <sup>ab</sup>  | 42.27±5.28 <sup>a</sup>   | 57.32±3.93 <sup>a</sup>   |
|                       |         | GV-16                                                      | 4.51±0.29 <sup>a</sup>    | 14.95±1.73 <sup>a</sup>    | 25.79±3.74 <sup>ab</sup>  | 32.59±1.34 <sup>b</sup>   | 46.01±2.97 <sup>bc</sup>  |
|                       |         | GV-17                                                      | 5.66±1.63 <sup>a</sup>    | 19.27±5.85 <sup>a</sup>    | 32.11±10.16 <sup>a</sup>  | 40.84±8.25 <sup>a</sup>   | 54.26±10.36 <sup>ab</sup> |
|                       |         | GV-22                                                      | 1.63±0.96 <sup>b</sup>    | 6.33±0.39 <sup>b</sup>     | 19.65±2.01 <sup>b</sup>   | 32.5±1.92 <sup>b</sup>    | 51.19±4.6 <sup>ab</sup>   |
| Initial pH            | pH 3.0  | GV-5                                                       | 0.51±0.17 <sup>ab</sup>   | 3.73±0.47 <sup>c</sup>     | 30.42±6.6 <sup>c</sup>    | 32.41±6.6 <sup>d</sup>    | 30.11±7.06 <sup>b</sup>   |
|                       |         | GV-8                                                       | 1.12±0.38 <sup>a</sup>    | 65.39±1.87 <sup>a</sup>    | 78.12±3.09 <sup>a</sup>   | 74.59±4.31 <sup>a</sup>   | 66.77±1.72 <sup>a</sup>   |
|                       |         | GV-12                                                      | 0.46±0.46 <sup>ab</sup>   | 51.38±9.83 <sup>b</sup>    | 65.8±10.9 <sup>ab</sup>   | 62.27±5.7 <sup>b</sup>    | 57.06±4.94 <sup>a</sup>   |
|                       |         | GV-16                                                      | 0.01±0.01 <sup>b</sup>    | 38.9±8.92 <sup>bc</sup>    | 55.78±6.02 <sup>b</sup>   | 58.84±1.04 <sup>bc</sup>  | 56.08±8.92 <sup>a</sup>   |
|                       |         | GV-17                                                      | 0.87±0.78 <sup>a</sup>    | 30.47±10.6 <sup>cd</sup>   | 53.93±10.3 <sup>b</sup>   | 53.63±2.26 <sup>c</sup>   | 51.94±13.51 <sup>a</sup>  |
|                       |         | GV-22                                                      | 0.31±0.4 <sup>ab</sup>    | 21.58±2.8 <sup>d</sup>     | 38.14±0.76 <sup>c</sup>   | 36.61±2.8 <sup>d</sup>    | 30.47±11.2 <sup>b</sup>   |
|                       | pH 4.0  | GV-5                                                       | 24.08±0.41 <sup>c</sup>   | 103.53±0.85 <sup>ab</sup>  | 107.67±0.15 <sup>c</sup>  | 106.75±3.45 <sup>b</sup>  | 103.68±0.85 <sup>a</sup>  |
|                       |         | GV-8                                                       | 45.65±2.62 <sup>a</sup>   | 105.32±21.78 <sup>ab</sup> | 123.11±2.61 <sup>a</sup>  | 115.59±5.83 <sup>a</sup>  | 88.91±4.45 <sup>b</sup>   |
|                       |         | GV-12                                                      | 33.44±1.38 <sup>b</sup>   | 109.66±3.99 <sup>a</sup>   | 117.79±6.75 <sup>ab</sup> | 115.03±7.67 <sup>ab</sup> | 110.43±8.13 <sup>a</sup>  |
|                       |         | GV-16                                                      | 16.87±1.53 <sup>d</sup>   | 70.25±10.28 <sup>c</sup>   | 86.2±2.61 <sup>d</sup>    | 85.89±2.15 <sup>c</sup>   | 82.67±1.69 <sup>b</sup>   |
|                       |         | GV-17                                                      | 15.95±1.53 <sup>d</sup>   | 69.33±2.77 <sup>c</sup>    | 86.96±4.3 <sup>d</sup>    | 84.97±1.84 <sup>c</sup>   | 73.31±3.84 <sup>c</sup>   |
|                       |         | GV-22                                                      | 17.79±3.07 <sup>d</sup>   | 87.12±2.15 <sup>bc</sup>   | 113.04±1.38 <sup>bc</sup> | 108.9±3.38 <sup>ab</sup>  | 107.52±5.37 <sup>a</sup>  |

<sup>1</sup> Values are presented as means ± standard deviation. Different letters in the same column show significant differences ( $P < 0.05$ ) in Duncan's multiple range test.

**Table 2.** Fermentation efficiency under multiple starters according to initial pH and fermentation period.

| Initial pH | Strains <sup>1</sup> | Efficiency (%) according to the fermentation period (days) |                         |                         |                          |                          |                           |                          |                          |                          |
|------------|----------------------|------------------------------------------------------------|-------------------------|-------------------------|--------------------------|--------------------------|---------------------------|--------------------------|--------------------------|--------------------------|
|            |                      | 3                                                          | 6                       | 9                       | 12                       | 15                       | 18                        | 21                       | 24                       | 27                       |
| pH 3.0     | AB                   | 0.64±0.21 <sup>2a</sup>                                    | 3.14±1.18 <sup>b</sup>  | 10.58±0.49 <sup>b</sup> | 31.11±2.45 <sup>b</sup>  | 40.33±0.7 <sup>b</sup>   | 45.37±0.94 <sup>cde</sup> | 56.56±2.34 <sup>b</sup>  | 54.72±0.77 <sup>b</sup>  | 58.77±0.39 <sup>c</sup>  |
|            | AC                   | 0.97±0.9 <sup>a</sup>                                      | 4.22±0.19 <sup>a</sup>  | 17.31±0.66 <sup>a</sup> | 40.79±5.86 <sup>a</sup>  | 47.74±4.15 <sup>a</sup>  | 57.02±2.65 <sup>a</sup>   | 64.64±2.98 <sup>a</sup>  | 57.95±1.36 <sup>a</sup>  | 63.91±2.23 <sup>a</sup>  |
|            | AD                   | 0.35±0.19 <sup>a</sup>                                     | 1.28±0.21 <sup>c</sup>  | 10.52±0.65 <sup>b</sup> | 27.74±2.15 <sup>bc</sup> | 35.61±0.43 <sup>cd</sup> | 42.55±4.25 <sup>e</sup>   | 50.6±1.99 <sup>d</sup>   | 42.06±2.48 <sup>e</sup>  | 54.97±0.85 <sup>d</sup>  |
|            | BC                   | 0.22±0.1 <sup>a</sup>                                      | 2.18±0.65 <sup>bc</sup> | 8.21±0.37 <sup>c</sup>  | 23.89±0.37 <sup>c</sup>  | 32.49±1.02 <sup>d</sup>  | 47.37±2.62 <sup>bcd</sup> | 55.54±2.25 <sup>bc</sup> | 51.55±0.55 <sup>c</sup>  | 61.81±0.7 <sup>b</sup>   |
|            | BD                   | 0.97±0.99 <sup>a</sup>                                     | 3.1±0.28 <sup>b</sup>   | 7.1±0.21 <sup>d</sup>   | 25.18±2.82 <sup>c</sup>  | 34.03±2.03 <sup>cd</sup> | 43.13±2.61 <sup>de</sup>  | 51.8±2.6 <sup>cd</sup>   | 47.62±1.01 <sup>d</sup>  | 55.06±0.11 <sup>d</sup>  |
|            | CD                   | 0.66±0.34 <sup>a</sup>                                     | 2.04±0.38 <sup>bc</sup> | 8.74±0.28 <sup>c</sup>  | 27.73±1.53 <sup>bc</sup> | 40.03±0.43 <sup>b</sup>  | 50.84±1.92 <sup>b</sup>   | 63.27±1.31 <sup>a</sup>  | 58.29±0.21 <sup>a</sup>  | 59.82±0.65 <sup>bc</sup> |
|            | ABCD                 | 0.78±0.53 <sup>a</sup>                                     | 2.11±0.49 <sup>bc</sup> | 8.52±0.28 <sup>c</sup>  | 28.44±2.03 <sup>bc</sup> | 36.43±0.49 <sup>c</sup>  | 48.54±1.11 <sup>bc</sup>  | 63.6±3.78 <sup>a</sup>   | 58.01±0.64 <sup>a</sup>  | 61.14±1.61 <sup>b</sup>  |
| pH 4.0     | AB                   | 1.3±0.28 <sup>cd</sup>                                     | 2.96±0.28 <sup>d</sup>  | 6.53±0.49 <sup>e</sup>  | 12.92±0.1 <sup>e</sup>   | 15.87±0.38 <sup>d</sup>  | 22.08±0.95 <sup>d</sup>   | 30.35±1.69 <sup>d</sup>  | 31.93±1.23 <sup>d</sup>  | 42.48±0.46 <sup>e</sup>  |
|            | AC                   | 2.13±0.65 <sup>ab</sup>                                    | 3.05±0.28 <sup>d</sup>  | 6.78±0.36 <sup>e</sup>  | 13.56±0.53 <sup>de</sup> | 14.91±0.21 <sup>e</sup>  | 21.31±1.59 <sup>d</sup>   | 25.46±1.84 <sup>e</sup>  | 29.29±1.54 <sup>de</sup> | 38.34±4.14 <sup>c</sup>  |
|            | AD                   | 2.66±0.21 <sup>a</sup>                                     | 5.48±0.28 <sup>a</sup>  | 14.33±0.38 <sup>a</sup> | 26.81±0.28 <sup>a</sup>  | 31.98±0.46 <sup>a</sup>  | 46.98±2.62 <sup>a</sup>   | 59.05±2.92 <sup>a</sup>  | 58.28±0.92 <sup>a</sup>  | 72.55±3.53 <sup>a</sup>  |
|            | BC                   | 1.58±0 <sup>bc</sup>                                       | 3.61±0.37 <sup>c</sup>  | 7.72±0.39 <sup>d</sup>  | 16.52±1.21 <sup>c</sup>  | 18.73±0.64 <sup>c</sup>  | 30.23±1.87 <sup>c</sup>   | 37.73±3.07 <sup>c</sup>  | 42.48±0.92 <sup>c</sup>  | 58.13±3.53 <sup>b</sup>  |
|            | BD                   | 2.16±0.32 <sup>ab</sup>                                    | 3.95±0.28 <sup>c</sup>  | 11.26±0.28 <sup>b</sup> | 22.63±0.37 <sup>b</sup>  | 25.22±0.49 <sup>b</sup>  | 32.35±1.5 <sup>bc</sup>   | 40.49±3.22 <sup>bc</sup> | 47.09±0.46 <sup>b</sup>  | 61.2±2.15 <sup>b</sup>   |
|            | CD                   | 0.69±0.32 <sup>d</sup>                                     | 1.37±0.28 <sup>e</sup>  | 6.65±0.1 <sup>e</sup>   | 14.64±0.57 <sup>d</sup>  | 15.5±0.65 <sup>de</sup>  | 22.64±2.17 <sup>d</sup>   | 26.69±2.46 <sup>de</sup> | 28.83±2.92 <sup>e</sup>  | 38.19±0.15 <sup>c</sup>  |
|            | ABCD                 | 1.33±0.42 <sup>cd</sup>                                    | 4.47±0.28 <sup>b</sup>  | 10.31±0.19 <sup>c</sup> | 21.68±0.93 <sup>b</sup>  | 25.62±0.49 <sup>b</sup>  | 33.85±1.82 <sup>b</sup>   | 42.64±1.54 <sup>b</sup>  | 47.7±2.15 <sup>b</sup>   | 61.04±0.92 <sup>b</sup>  |

<sup>1</sup> Symbols: A, *Acetobacter ascendens* GV–8; B, *A. ascendens* GV–12; C, *A. pasteurianus* GV–17; D, *A. pasteurianus* GV–22.

<sup>2</sup> Values are presented as means ± standard deviation. Different letters in the same column show significant differences ( $P < 0.05$ ) in Duncan's multiple range test.

**Table 3.** Volatile compounds according to fermentation period using *Acetobacter ascendens* GV-8 (A) and *A. ascendens* GV-12 (B) (Unit: Area%)

| Compounds                            | Temp. <sup>1</sup> | 20°C                      |                         |                         |                         | 30°C                    |                         |                         |                         |
|--------------------------------------|--------------------|---------------------------|-------------------------|-------------------------|-------------------------|-------------------------|-------------------------|-------------------------|-------------------------|
|                                      | Period (days)      | 0                         | 12                      | 18                      | 27                      | 0                       | 12                      | 18                      | 27                      |
| Acetic acid, ethyl ester             |                    | 71.89±2.45 <sup>2,b</sup> | 81.85±2.02 <sup>a</sup> | 79.15±0.79 <sup>a</sup> | 81.27±2.41 <sup>a</sup> | 67.29±2.16 <sup>c</sup> | 78.93±1.68 <sup>b</sup> | 84.51±1.32 <sup>a</sup> | 16.18±2.45 <sup>d</sup> |
| Ethanol                              |                    | 14.61±0.53 <sup>a</sup>   | 10.9±0.86 <sup>b</sup>  | 10.32±0.42 <sup>b</sup> | 6.75±0.31 <sup>c</sup>  | 17.27±0.74 <sup>a</sup> | 9.47±0.50 <sup>b</sup>  | 6.49±0.47 <sup>c</sup>  | ND <sup>3</sup>         |
| 2-Methyl-1-propanol                  |                    | 0.02±0.00 <sup>b</sup>    | 0.04±0.01 <sup>ab</sup> | 0.03±0.02 <sup>b</sup>  | 0.06±0.02 <sup>a</sup>  | 0.01±0.00 <sup>c</sup>  | 0.04±0.00 <sup>ab</sup> | 0.03±0.01 <sup>b</sup>  | 0.04±0.01 <sup>a</sup>  |
| 2-Octanone                           |                    | 0.02±0.00 <sup>c</sup>    | 0.06±0.01 <sup>b</sup>  | 0.05±0.02 <sup>b</sup>  | 0.08±0.01 <sup>a</sup>  | ND                      | 0.02±0.01 <sup>c</sup>  | 0.03±0.01 <sup>b</sup>  | 0.04±0.00 <sup>a</sup>  |
| 2-Methyl-1-butanol                   |                    | 0.02±0.00 <sup>b</sup>    | 0.03±0.00 <sup>b</sup>  | 0.02±0.00 <sup>b</sup>  | 0.05±0.02 <sup>a</sup>  | ND                      | 0.04±0.01 <sup>b</sup>  | 0.04±0.01 <sup>b</sup>  | 0.08±0.02 <sup>a</sup>  |
| Octanal                              |                    | 0.07±0.01 <sup>a</sup>    | 0.08±0.02 <sup>a</sup>  | 0.09±0.01 <sup>a</sup>  | 0.07±0.01 <sup>a</sup>  | 0.07±0.01 <sup>bc</sup> | 0.11±0.03 <sup>ab</sup> | 0.15±0.03 <sup>a</sup>  | 0.06±0.01 <sup>c</sup>  |
| 2-Hexadecanol                        |                    | 0.07±0.00 <sup>b</sup>    | 0.17±0.03 <sup>a</sup>  | 0.18±0.05 <sup>a</sup>  | 0.17±0.04 <sup>a</sup>  | 0.16±0.05 <sup>a</sup>  | 0.13±0.05 <sup>a</sup>  | 0.16±0.04 <sup>a</sup>  | 0.15±0.05 <sup>a</sup>  |
| 6-Methyl-5-hepten-2-one              |                    | 0.05±0.00 <sup>a</sup>    | 0.02±0.00 <sup>b</sup>  | 0.02±0.01 <sup>b</sup>  | 0.01±0.00 <sup>b</sup>  | 0.08±0.01 <sup>a</sup>  | 0.05±0.01 <sup>b</sup>  | 0.07±0.02 <sup>ab</sup> | 0.08±0.02 <sup>ab</sup> |
| Acetic acid, 2-ethylhexyl ester      |                    | 0.07±0.00 <sup>a</sup>    | 0.09±0.01 <sup>a</sup>  | 0.12±0.04 <sup>a</sup>  | 0.12±0.03 <sup>a</sup>  | ND                      | 0.05±0.02 <sup>a</sup>  | 0.06±0.02 <sup>a</sup>  | 0.07±0.03 <sup>a</sup>  |
| Nonanal                              |                    | 0.17±0.00 <sup>b</sup>    | 0.17±0.03 <sup>b</sup>  | 0.23±0.04 <sup>a</sup>  | 0.18±0.02 <sup>ab</sup> | 0.16±0.01 <sup>b</sup>  | 0.19±0.02 <sup>b</sup>  | 0.26±0.04 <sup>a</sup>  | 0.15±0.03 <sup>b</sup>  |
| Acetic acid                          |                    | 1.08±0.02 <sup>c</sup>    | 3.78±0.02 <sup>a</sup>  | 1.28±0.22 <sup>c</sup>  | 2.47±0.10 <sup>b</sup>  | 0.69±0.02 <sup>d</sup>  | 2.11±0.06 <sup>c</sup>  | 2.98±0.10 <sup>b</sup>  | 6.30±0.09 <sup>a</sup>  |
| 2-Ethylhexanol                       |                    | 1.48±0.02 <sup>bc</sup>   | 1.35±0.03 <sup>c</sup>  | 1.65±0.22 <sup>ab</sup> | 1.70±0.02 <sup>a</sup>  | 0.60±0.01 <sup>d</sup>  | 1.54±0.07 <sup>a</sup>  | 1.18±0.02 <sup>c</sup>  | 1.39±0.11 <sup>b</sup>  |
| Decanal                              |                    | 0.38±0.02 <sup>a</sup>    | 0.20±0.02 <sup>b</sup>  | 0.22±0.03 <sup>b</sup>  | 0.27±0.08 <sup>b</sup>  | 0.40±0.02 <sup>b</sup>  | 0.47±0.05 <sup>b</sup>  | 0.68±0.12 <sup>a</sup>  | 0.41±0.03 <sup>b</sup>  |
| 2-Amino-5-methylbenzoic acid         |                    | 0.55±0.04 <sup>c</sup>    | 0.64±0.06 <sup>bc</sup> | 0.69±0.04 <sup>b</sup>  | 0.83±0.07 <sup>a</sup>  | 0.60±0.02 <sup>a</sup>  | 0.45±0.07 <sup>c</sup>  | 0.56±0.05 <sup>ab</sup> | 0.49±0.02 <sup>bc</sup> |
| 2-Hydroxy-Benzoic acid, methyl ester |                    | 1.38±0.02 <sup>d</sup>    | 3.85±0.08 <sup>c</sup>  | 5.70±0.02 <sup>a</sup>  | 5.18±0.30 <sup>b</sup>  | 2.37±0.09 <sup>d</sup>  | 2.70±0.21 <sup>c</sup>  | 3.30±0.09 <sup>a</sup>  | 3.05±0.09 <sup>b</sup>  |
| 2,4-Di-tert-butylphenol              |                    | 2.34±0.05 <sup>b</sup>    | 3.32±0.18 <sup>a</sup>  | 3.43±0.34 <sup>a</sup>  | 3.25±0.12 <sup>a</sup>  | 1.44±0.05 <sup>c</sup>  | 2.29±0.31 <sup>b</sup>  | 2.69±0.10 <sup>a</sup>  | 1.67±0.03 <sup>c</sup>  |

<sup>1</sup> Fermentation temperature.<sup>2</sup> Values are presented as means ± standard deviation. Different letters in the same row show significant differences ( $P < 0.05$ ) in Duncan's multiple range test.<sup>3</sup> Not detected.

**Table 4.** Volatile compounds according to fermentation period using *Acetobacter ascendens* GV-8 (A) and *Acetobacter pasteurianus* GV-22 (D) (Unit: Area%).

| Compounds                            | Temp. <sup>1</sup> | 20°C                       |                          |                          |                         | 30°C                    |                         |                         |                         |
|--------------------------------------|--------------------|----------------------------|--------------------------|--------------------------|-------------------------|-------------------------|-------------------------|-------------------------|-------------------------|
|                                      | Period (days)      | 0                          | 12                       | 18                       | 27                      | 0                       | 12                      | 18                      | 27                      |
| Acetic acid, ethyl ester             |                    | 123.43±1.26 <sup>2,a</sup> | 108.39±1.57 <sup>c</sup> | 118.44±1.39 <sup>b</sup> | 87.30±0.66 <sup>d</sup> | 70.28±1.11 <sup>c</sup> | 96.86±3.01 <sup>a</sup> | 91.62±1.10 <sup>b</sup> | 1.42±0.12 <sup>d</sup>  |
| Ethanol                              |                    | 217.16±2.60 <sup>a</sup>   | 14.30±0.26 <sup>b</sup>  | 12.99±0.19 <sup>b</sup>  | 6.77±0.32 <sup>c</sup>  | 16.39±0.12 <sup>a</sup> | 10.63±0.29 <sup>b</sup> | 6.35±0.19 <sup>c</sup>  | ND <sup>3</sup>         |
| 2-Methyl-1-propanol                  |                    | 0.23±0.05 <sup>a</sup>     | 0.05±0.01 <sup>b</sup>   | 0.05±0.01 <sup>b</sup>   | 0.12±0.05 <sup>b</sup>  | ND                      | 0.06±0.01 <sup>a</sup>  | 0.11±0.06 <sup>a</sup>  | 0.07±0.01 <sup>a</sup>  |
| 2-Octanone                           |                    | 0.11±0.01 <sup>a</sup>     | 0.02±0.01 <sup>b</sup>   | 0.04±0.02 <sup>b</sup>   | 0.02±0.00 <sup>b</sup>  | ND                      | 0.04±0.02 <sup>a</sup>  | 0.02±0.01 <sup>bc</sup> | 0.03±0.01 <sup>ab</sup> |
| 2-Methyl-1-butanol                   |                    | 0.29±0.05 <sup>a</sup>     | 0.06±0.01 <sup>b</sup>   | 0.07±0.02 <sup>b</sup>   | 0.08±0.02 <sup>b</sup>  | ND                      | 0.04±0.01 <sup>a</sup>  | 0.04±0.01 <sup>a</sup>  | 0.04±0.00 <sup>a</sup>  |
| Octanal                              |                    | 1.30±0.18 <sup>a</sup>     | 0.08±0.01 <sup>b</sup>   | 0.12±0.04 <sup>b</sup>   | 0.06±0.01 <sup>b</sup>  | 0.04±0.01 <sup>c</sup>  | 0.09±0.01 <sup>a</sup>  | 0.06±0.00 <sup>b</sup>  | 0.09±0.01 <sup>a</sup>  |
| 2-Hexadecanol                        |                    | 0.63±0.07 <sup>a</sup>     | 0.06±0.02 <sup>c</sup>   | 0.08±0.01 <sup>c</sup>   | 0.18±0.08 <sup>b</sup>  | 0.14±0.06 <sup>a</sup>  | 0.15±0.05 <sup>a</sup>  | 0.15±0.04 <sup>a</sup>  | 0.19±0.10 <sup>a</sup>  |
| 6-Methyl-5-hepten-2-one              |                    | 0.16±0.07 <sup>a</sup>     | 0.04±0.01 <sup>b</sup>   | 0.09±0.01 <sup>ab</sup>  | 0.04±0.03 <sup>b</sup>  | 0.05±0.02 <sup>b</sup>  | 0.05±0.01 <sup>b</sup>  | 0.08±0.00 <sup>ab</sup> | 0.13±0.07 <sup>a</sup>  |
| Acetic acid, 2-ethylhexyl ester      |                    | 0.78±0.06 <sup>a</sup>     | 0.04±0.00 <sup>b</sup>   | 0.05±0.02 <sup>b</sup>   | 0.07±0.03 <sup>b</sup>  | 0.03±0.02 <sup>a</sup>  | 0.05±0.01 <sup>a</sup>  | 0.04±0.01 <sup>a</sup>  | 0.05±0.01 <sup>a</sup>  |
| Nonanal                              |                    | 3.20±0.06 <sup>a</sup>     | 0.31±0.05 <sup>b</sup>   | 0.25±0.05 <sup>bc</sup>  | 0.18±0.09 <sup>c</sup>  | 0.13±0.06 <sup>c</sup>  | 0.17±0.01 <sup>c</sup>  | 0.28±0.03 <sup>b</sup>  | 0.47±0.06 <sup>a</sup>  |
| Acetic acid                          |                    | 16.29±1.38 <sup>a</sup>    | 2.44±0.23 <sup>b</sup>   | 2.40±0.44 <sup>b</sup>   | 2.80±0.12 <sup>b</sup>  | 0.81±0.15 <sup>d</sup>  | 2.50±0.03 <sup>c</sup>  | 4.37±0.10 <sup>b</sup>  | 10.78±0.77 <sup>a</sup> |
| 2-Ethylhexanol                       |                    | 15.70±0.95 <sup>a</sup>    | 1.39±0.39 <sup>b</sup>   | 1.37±0.26 <sup>b</sup>   | 1.32±0.05 <sup>b</sup>  | 1.13±0.12 <sup>bc</sup> | 1.10±0.07 <sup>c</sup>  | 1.30±0.07 <sup>b</sup>  | 1.56±0.11 <sup>a</sup>  |
| Decanal                              |                    | 6.15±0.03 <sup>a</sup>     | 0.55±0.18 <sup>b</sup>   | 0.48±0.09 <sup>b</sup>   | 0.21±0.07 <sup>c</sup>  | 0.28±0.08 <sup>b</sup>  | 0.50±0.15 <sup>a</sup>  | 0.32±0.06 <sup>ab</sup> | 0.33±0.08 <sup>ab</sup> |
| 2-Amino-5-methylbenzoic acid         |                    | 4.89±0.54 <sup>a</sup>     | 0.42±0.14 <sup>b</sup>   | 0.61±0.29 <sup>b</sup>   | 0.79±0.04 <sup>b</sup>  | 0.57±0.03 <sup>a</sup>  | 0.42±0.06 <sup>b</sup>  | 0.44±0.04 <sup>b</sup>  | 0.47±0.05 <sup>b</sup>  |
| 2-Hydroxy-Benzoic acid, methyl ester |                    | 13.07±0.29 <sup>a</sup>    | 1.23±0.09 <sup>c</sup>   | 1.45±0.18 <sup>bc</sup>  | 1.76±0.04 <sup>b</sup>  | 3.01±0.05 <sup>c</sup>  | 3.47±0.11 <sup>b</sup>  | 3.56±0.02 <sup>ab</sup> | 3.76±0.19 <sup>a</sup>  |
| 2,4-Di-tert-butylphenol              |                    | 18.93±0.68 <sup>a</sup>    | 1.83±0.07 <sup>b</sup>   | 2.49±0.19 <sup>b</sup>   | 2.52±0.37 <sup>b</sup>  | 2.76±0.07 <sup>ab</sup> | 2.48±0.28 <sup>b</sup>  | 2.60±0.06 <sup>ab</sup> | 3.05±0.39 <sup>a</sup>  |

<sup>1</sup> Fermentation temperature.

<sup>2</sup> Values are presented as means ± standard deviation. Different letters in the same row show significant differences ( $P < 0.05$ ) in Duncan's multiple range test.

<sup>3</sup> Not detected.

**Table 5.** Volatile compounds according to fermentation period using *A. ascendens* GV-8 (A), *A. ascendens* GV-12 (B), *A. pasteurianus* GV-17 (C), and *A. pasteurianus* GV-22 (D) (Unit: Area%).

| Compounds                            | Temp. <sup>1</sup> | 20°C                       |                         |                          |                         | 30°C                    |                          |                          |                         |
|--------------------------------------|--------------------|----------------------------|-------------------------|--------------------------|-------------------------|-------------------------|--------------------------|--------------------------|-------------------------|
|                                      | Period (days)      | 0                          | 12                      | 18                       | 27                      | 0                       | 12                       | 18                       | 27                      |
| Acetic acid, ethyl ester             |                    | 103.52±1.76 <sup>2,a</sup> | 98.73±1.55 <sup>b</sup> | 107.63±3.51 <sup>a</sup> | 92.50±1.50 <sup>c</sup> | 56.50±3.90 <sup>c</sup> | 86.70±1.97 <sup>b</sup>  | 98.89±1.02 <sup>a</sup>  | 99.15±0.78 <sup>a</sup> |
| Ethanol                              |                    | 18.6±0.46 <sup>a</sup>     | 11.17±0.55 <sup>b</sup> | 11.68±0.28 <sup>b</sup>  | 6.14±0.11 <sup>c</sup>  | 18.93±0.82 <sup>a</sup> | 17.23±1.77 <sup>ab</sup> | 16.06±3.31 <sup>ab</sup> | 12.63±2.79 <sup>b</sup> |
| 2-Methyl-1-propanol                  |                    | 0.03±0.01 <sup>a</sup>     | 0.06±0.03 <sup>a</sup>  | 0.03±0.00 <sup>a</sup>   | 0.06±0.01 <sup>a</sup>  | ND <sup>3</sup>         | 0.02±0.02 <sup>a</sup>   | 0.03±0.03 <sup>a</sup>   | 0.03±0.02 <sup>a</sup>  |
| 2-Octanone                           |                    | 0.02±0.00 <sup>a</sup>     | 0.02±0.01 <sup>a</sup>  | 0.01±0.01 <sup>a</sup>   | 0.03±0.02 <sup>a</sup>  | ND                      | ND                       | 0.03±0.03 <sup>a</sup>   | 0.03±0.03 <sup>a</sup>  |
| 2-Methyl-1-butanol                   |                    | 0.01±0.00 <sup>b</sup>     | 0.03±0.01 <sup>a</sup>  | 0.04±0.01 <sup>a</sup>   | 0.05±0.02 <sup>a</sup>  | ND                      | ND                       | 0.04±0.03 <sup>ab</sup>  | 0.07±0.01 <sup>a</sup>  |
| Octanal                              |                    | 0.11±0.06 <sup>a</sup>     | 0.05±0.01 <sup>a</sup>  | 0.04±0.00 <sup>a</sup>   | 0.06±0.01 <sup>a</sup>  | 0.07±0.02 <sup>b</sup>  | 0.17±0.10 <sup>ab</sup>  | 0.21±0.06 <sup>a</sup>   | 0.13±0.00 <sup>ab</sup> |
| 2-Hexadecanol                        |                    | 0.15±0.05 <sup>a</sup>     | 0.15±0.03 <sup>a</sup>  | 0.10±0.00 <sup>a</sup>   | 0.16±0.09 <sup>a</sup>  | 0.08±0.02 <sup>a</sup>  | 0.06±0.03 <sup>a</sup>   | 0.11±0.07 <sup>a</sup>   | 0.12±0.05 <sup>a</sup>  |
| 6-Methyl-5-hepten-2-one              |                    | 0.07±0.07 <sup>a</sup>     | 0.07±0.00 <sup>a</sup>  | 0.03±0.01 <sup>a</sup>   | 0.06±0.01 <sup>a</sup>  | 0.06±0.00 <sup>b</sup>  | 0.14±0.04 <sup>a</sup>   | 0.08±0.03 <sup>b</sup>   | 0.15±0.00 <sup>a</sup>  |
| Acetic acid, 2-ethylhexyl ester      |                    | 0.12±0.06 <sup>a</sup>     | 0.08±0.02 <sup>ab</sup> | 0.08±0.01 <sup>ab</sup>  | 0.05±0.01 <sup>b</sup>  | 0.06±0.01 <sup>a</sup>  | 0.10±0.02 <sup>a</sup>   | 0.10±0.07 <sup>a</sup>   | 0.07±0.01 <sup>a</sup>  |
| Nonanal                              |                    | 0.16±0.01 <sup>b</sup>     | 0.12±0.04 <sup>b</sup>  | 0.20±0.07 <sup>ab</sup>  | 0.25±0.03 <sup>a</sup>  | 0.19±0.02 <sup>b</sup>  | 0.39±0.08 <sup>a</sup>   | 0.51±0.07 <sup>a</sup>   | 0.38±0.09 <sup>a</sup>  |
| Acetic acid                          |                    | 1.56±0.12 <sup>b</sup>     | 1.53±0.10 <sup>b</sup>  | 1.87±0.10 <sup>b</sup>   | 4.70±1.65 <sup>a</sup>  | 1.10±0.14 <sup>c</sup>  | 1.46±0.13 <sup>b</sup>   | 1.55±0.12 <sup>b</sup>   | 2.18±0.14 <sup>a</sup>  |
| 2-Ethylhexanol                       |                    | 1.39±0.03 <sup>a</sup>     | 1.69±0.25 <sup>a</sup>  | 1.62±0.05 <sup>a</sup>   | 1.39±0.26 <sup>a</sup>  | 1.41±0.07 <sup>a</sup>  | 1.74±0.19 <sup>a</sup>   | 1.44±0.22 <sup>a</sup>   | 1.64±0.24 <sup>a</sup>  |
| Decanal                              |                    | 0.32±0.08 <sup>ab</sup>    | 0.22±0.05 <sup>b</sup>  | 0.27±0.10 <sup>ab</sup>  | 0.39±0.03 <sup>a</sup>  | 0.29±0.08 <sup>b</sup>  | 0.59±0.09 <sup>a</sup>   | 0.67±0.22 <sup>a</sup>   | 0.51±0.07 <sup>ab</sup> |
| 2-Amino-5-methylbenzoic acid         |                    | 0.61±0.05 <sup>a</sup>     | 0.62±0.06 <sup>a</sup>  | 0.51±0.07 <sup>a</sup>   | 0.70±0.25 <sup>a</sup>  | 0.41±0.07 <sup>a</sup>  | 0.46±0.11 <sup>a</sup>   | 0.49±0.08 <sup>a</sup>   | 0.44±0.12 <sup>a</sup>  |
| 2-Hydroxy-Benzoic acid, methyl ester |                    | 2.54±0.35 <sup>a</sup>     | 2.53±0.25 <sup>a</sup>  | 1.49±0.03 <sup>b</sup>   | 2.36±0.54 <sup>a</sup>  | 1.44±0.12 <sup>b</sup>  | 1.75±0.20 <sup>ab</sup>  | 1.93±0.07 <sup>a</sup>   | 1.70±0.28 <sup>ab</sup> |
| 2,4-Di-tert-butylphenol              |                    | 3.21±0.24 <sup>a</sup>     | 2.83±0.12 <sup>b</sup>  | 3.02±0.15 <sup>ab</sup>  | 1.77±0.18 <sup>c</sup>  | 2.54±0.12 <sup>b</sup>  | 3.26±0.28 <sup>a</sup>   | 2.91±0.59 <sup>ab</sup>  | 1.83±0.12 <sup>c</sup>  |

<sup>1</sup> Fermentation temperature.

<sup>2</sup> Values are presented as means ± standard deviation. Different letters in the same row show significant differences ( $P < 0.05$ ) in Duncan's multiple range test.

<sup>3</sup> Not detected.

**Table 6.** Alpha diversity analysis under multiple starters and fermentation temperature.

| Strain <sup>1</sup> | Temp. | Period (day) | Valid reads and OTUs |      | Species richness |      |           | Species evenness |         |         | Phylogenetic diversity | Good's coverage (%) |
|---------------------|-------|--------------|----------------------|------|------------------|------|-----------|------------------|---------|---------|------------------------|---------------------|
|                     |       |              | Target reads         | OTUs | ACE              | CHAO | Jackknife | NPSannon         | Shannon | Simpson |                        |                     |
| AB                  | 20°C  | 12           | 33,527               | 7    | 13               | 10   | 11        | 0                | 0       | 1       | 19                     | 100                 |
|                     |       | 27           | 30,341               | 9    | 14               | 12   | 14        | 0                | 0       | 1       | 44                     | 100                 |
|                     | 30°C  | 12           | 36,745               | 9    | 10               | 10   | 12        | 0                | 0       | 1       | 22                     | 100                 |
|                     |       | 27           | 33,253               | 5    | 11               | 7    | 8         | 0                | 0       | 1       | 10                     | 100                 |
| AD                  | 20°C  | 12           | 31,131               | 5    | 7                | 6    | 7         | 0                | 0       | 1       | 9                      | 100                 |
|                     |       | 27           | 28,716               | 12   | 18               | 15   | 18        | 0                | 0       | 1       | 28                     | 100                 |
|                     | 30°C  | 12           | 26,815               | 8    | 9                | 9    | 11        | 0                | 0       | 1       | 20                     | 100                 |
|                     |       | 27           | 29,326               | 9    | 37               | 20   | 20        | 0                | 0       | 1       | 40                     | 100                 |
| ABCD                | 20°C  | 12           | 33,601               | 7    | 9                | 8    | 10        | 0                | 0       | 1       | 21                     | 100                 |
|                     |       | 27           | 30,470               | 5    | 11               | 7    | 8         | 0                | 0       | 1       | 14                     | 100                 |
|                     | 30°C  | 12           | 34,377               | 4    | 4                | 4    | 5         | 0                | 0       | 1       | 11                     | 100                 |
|                     |       | 27           | 26,846               | 5    | 11               | 7    | 8         | 0                | 0       | 1       | 19                     | 100                 |

<sup>1</sup> Symbols: A, *Acetobacter ascendens* GV-8; B, *A. ascendens* GV-12; C, *A. pasteurianus* GV-17; D, *A. pasteurianus* GV-22.
